# Supplementary material for: Surface defect-regulated PdCu/TiO2−x promoting efficient electrocatalytic nitrogen reduction
Source: Royal Society of Chemistry journal article supplement (doi:10.1039/d2qm00453d), 2022-01-01
Supplement: d2qm00453d1.pdf [file d2qm00453d1.pdf]

Electronic Supplementary Material (ESI) for Materials Chemistry Frontiers.

## Electronic Supporting Information

### Surface defect-regulated PdCu/TiO<sub>2-x</sub> promoting efficient electrocatalytic nitrogen reduction

Chengguang Liu,<sup>a</sup> Xiaolei Guo,<sup>a</sup> Zhen-Feng Huang,<sup>\*a</sup> Jinheng Li,<sup>a</sup> Li Gan,<sup>a</sup> Lun Pan,<sup>a</sup> Chengxiang Shi,<sup>a</sup> Xiangwen Zhang,<sup>a</sup> Guidong Yang<sup>b</sup> and Ji-Jun Zou<sup>\*a</sup>

<sup>a</sup> Key Laboratory for Green Chemical Technology of the Ministry of Education, School of Chemical Engineering and Technology, Tianjin University, Tianjin 300072, P. R. China; Collaborative Innovative Center of Chemical Science and Engineering (Tianjin), Tianjin 300072, P. R. China; Zhejiang Institute of Tianjin University, Ningbo, Zhejiang, 315201, P. R. China.

<sup>b</sup> XJTU-Oxford Joint International Research Laboratory of Catalysis, School of Chemical Engineering and Technology, Xi'an Jiaotong University, Xi'an 7010049, China.

\* Corresponding author. E-mail: jj\_zou@tju.edu.cn and zfhuang@tju.edu.cn

## Experimental Section

### NH<sub>3</sub> quantification

The quantitative detection of NH<sub>3</sub> concentration in solution was based on indophenol blue coloration method.<sup>1,2</sup> Specifically, 2 mL cathode electrolyte and 2 mL absorption solution were collected, then 2 mL chromogenic reagent containing salicylic acid (5 wt%), sodium citrate (5 wt%) and 1 mol/L NaOH solution was added, followed by adding 1 mL NaClO solution (0.05 mol/L). and finally, 200 μL sodium nitroferricyanide solution (1 wt%) was added and then shaken slightly. The absorbance data of the UV-vis absorption spectra were measured on the UV-1800 spectrophotometer after standing the mixed solution in the dark and reacting for 2 h at room temperature. To further quantitative calculation, the absorbance (Abs, a.u.) of a series of standard NH<sub>4</sub>Cl solutions (c, μg mL<sup>-1</sup>) with specified concentrations at λ = 655 nm were recorded in advance. The NH<sub>4</sub><sup>+</sup> standard curve in 0.1 mol/L HCl is  $y = 0.361x + 0.036$  ( $R^2 = 0.999$ ).

### N<sub>2</sub>H<sub>4</sub> quantification

The quantitative detection of N<sub>2</sub>H<sub>4</sub> concentration in solution was based on the method of Watt and Chrisp.<sup>3,4</sup> A mixture of 5.99 g C<sub>9</sub>H<sub>11</sub>NO, 30 mL hydrochloric acid and 300 mL ethanol was used as an indicator. Afterward, 2 mL cathode electrolyte and 2 mL absorption solution were collected, followed by adding 2 mL of indicator into above solutions, respectively. The corresponding absorbance at λ = 455 nm were measured after at 10 min at room temperature. Similarly, The N<sub>2</sub>H<sub>4</sub> standard curve in 0.1 mol/L HCl was measured in advance, and the curve is  $y = 0.730x + 0.022$  ( $R^2 = 0.999$ ).

## **<sup>15</sup>N isotope labeling experiment**

When <sup>15</sup>N<sub>2</sub> (99%, Shanghai Aladdin Biochemical Technology Co., LTD.) was used as the only feed gas, the produced NH<sub>3</sub> was determined by <sup>1</sup>H NMR spectra, using to further verify the N source of the produced NH<sub>3</sub>. Before the electrochemical measurement, <sup>15</sup>N<sub>2</sub> was immersed in the electrolyte for 1h until saturation. 500 μL of the electrolyte after electrolysis at -0.1 V vs. RHE was collected and 50 μL of DMSO-D6 was added, and then determined by a <sup>1</sup>H NMR spectrometer. Furthermore, the same procedure was used to detect <sup>14</sup>NH<sub>3</sub> produced, apart from <sup>14</sup>N<sub>2</sub> (99.999 %) as the feed gas.

## **Computational criterion**

The NH<sub>3</sub> yield rate was calculated as follows equation:

$$\text{NH}_3 \text{ yield rate} = (c(\text{NH}_4^+) \times V) / (m_{\text{cat}} \times t)$$

where  $c(\text{NH}_4^+)$  is the concentration of NH<sub>4</sub><sup>+</sup> determined by indophenol blue method, quantitatively. V is the volume of the electrolyte,  $m_{\text{cat}}$  is the mass of the catalyst and t is the reduction time.

The Faradaic efficiency was estimated by the ratio of the charge consumed for NH<sub>3</sub> production to the total charge passing through the circuit. It was calculated according to following equation:

$$\text{FE} = 3 \times F \times c(\text{NH}_4^+) \times V / (17 \times Q)$$

where F is the Faraday constant (96485 C mol<sup>-1</sup>),  $c(\text{NH}_4^+)$  is the concentration of NH<sub>4</sub><sup>+</sup> determined by indophenol blue method, quantitatively. V is the volume of the electrolyte and Q is the quantity of applied electricity.

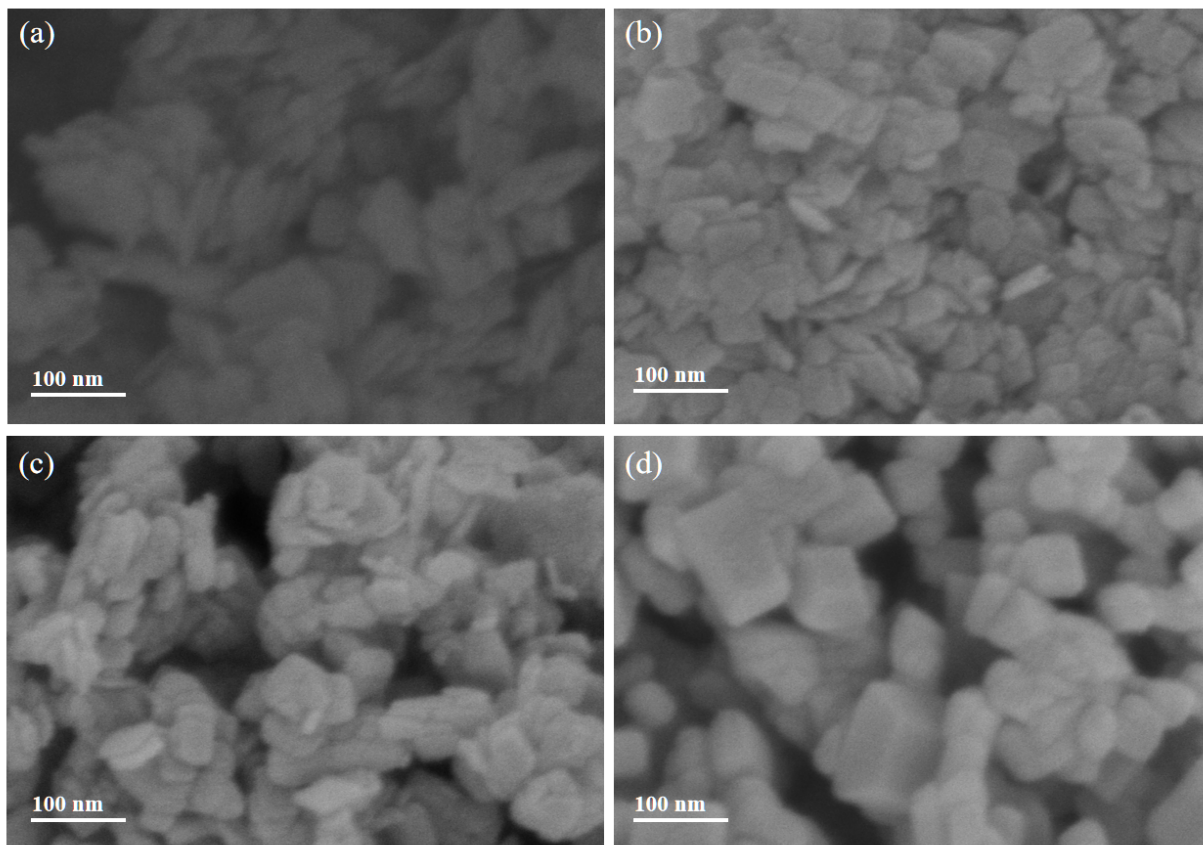

**Fig. S1.** SEM images of pristine TiO<sub>2</sub> and TiO<sub>2-x</sub>-*T* (*T* = 200, 400, 600). (a) SEM image of TiO<sub>2</sub>; (b) SEM image of TiO<sub>2-x</sub>-200; (c) SEM image of TiO<sub>2-x</sub>-400; (d) SEM image of TiO<sub>2-x</sub>-600.

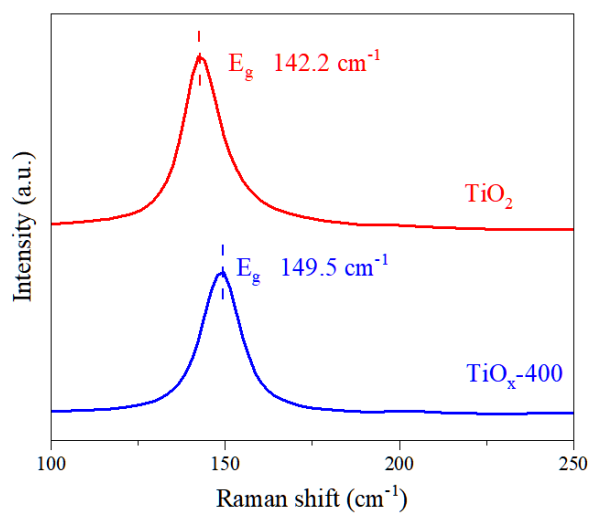

**Fig. S2.** Raman spectra of pristine TiO<sub>2</sub> and TiO<sub>2-x</sub>-400.

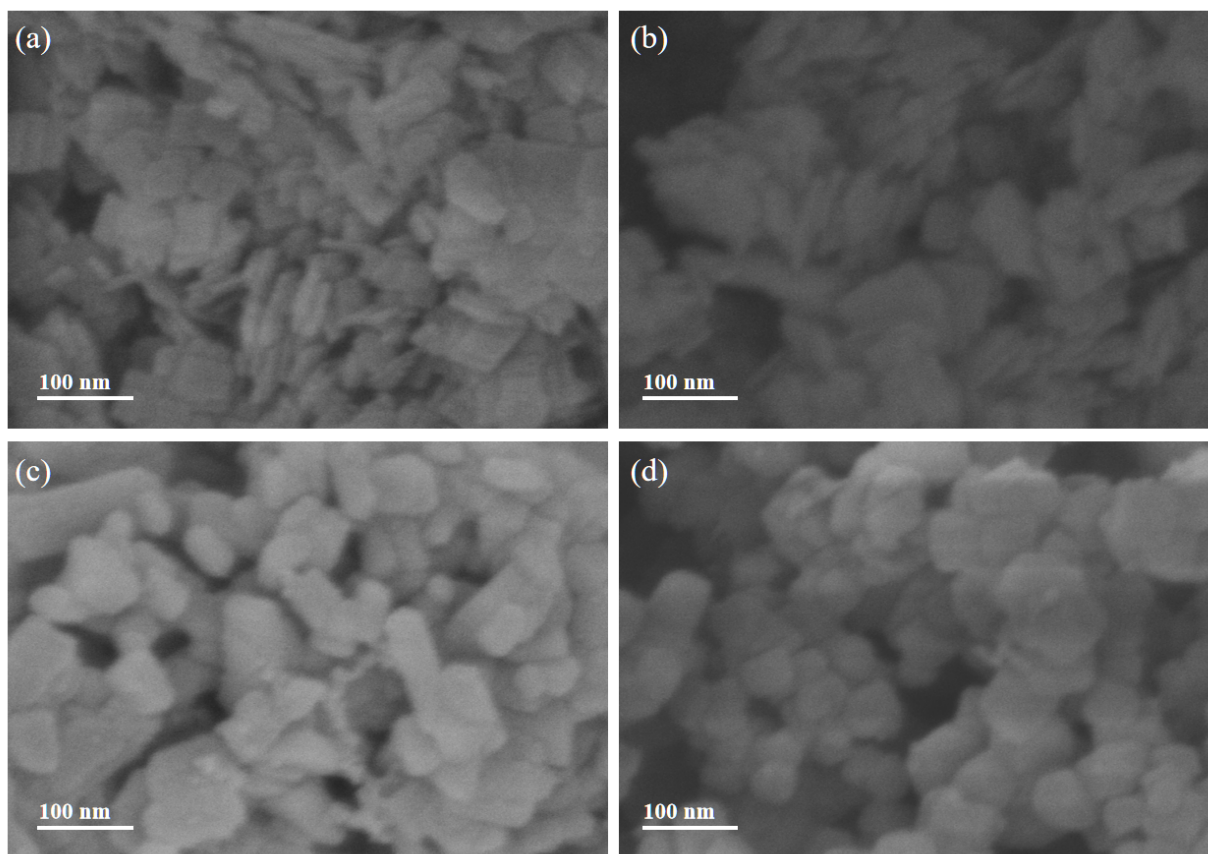

**Fig. S3.** SEM images of Pd<sub>1</sub>Cu<sub>1</sub>/TiO<sub>2</sub> and Pd<sub>1</sub>Cu<sub>1</sub>/TiO<sub>2-x</sub>-*T* (*T* = 200, 400, 600). (a) SEM image of Pd<sub>1</sub>Cu<sub>1</sub>/TiO<sub>2</sub>; (b) SEM image of Pd<sub>1</sub>Cu<sub>1</sub>/TiO<sub>2-x</sub>-200; (c) SEM image of Pd<sub>1</sub>Cu<sub>1</sub>/TiO<sub>2-x</sub>-400; (d) SEM image of Pd<sub>1</sub>Cu<sub>1</sub>/TiO<sub>2-x</sub>-600.

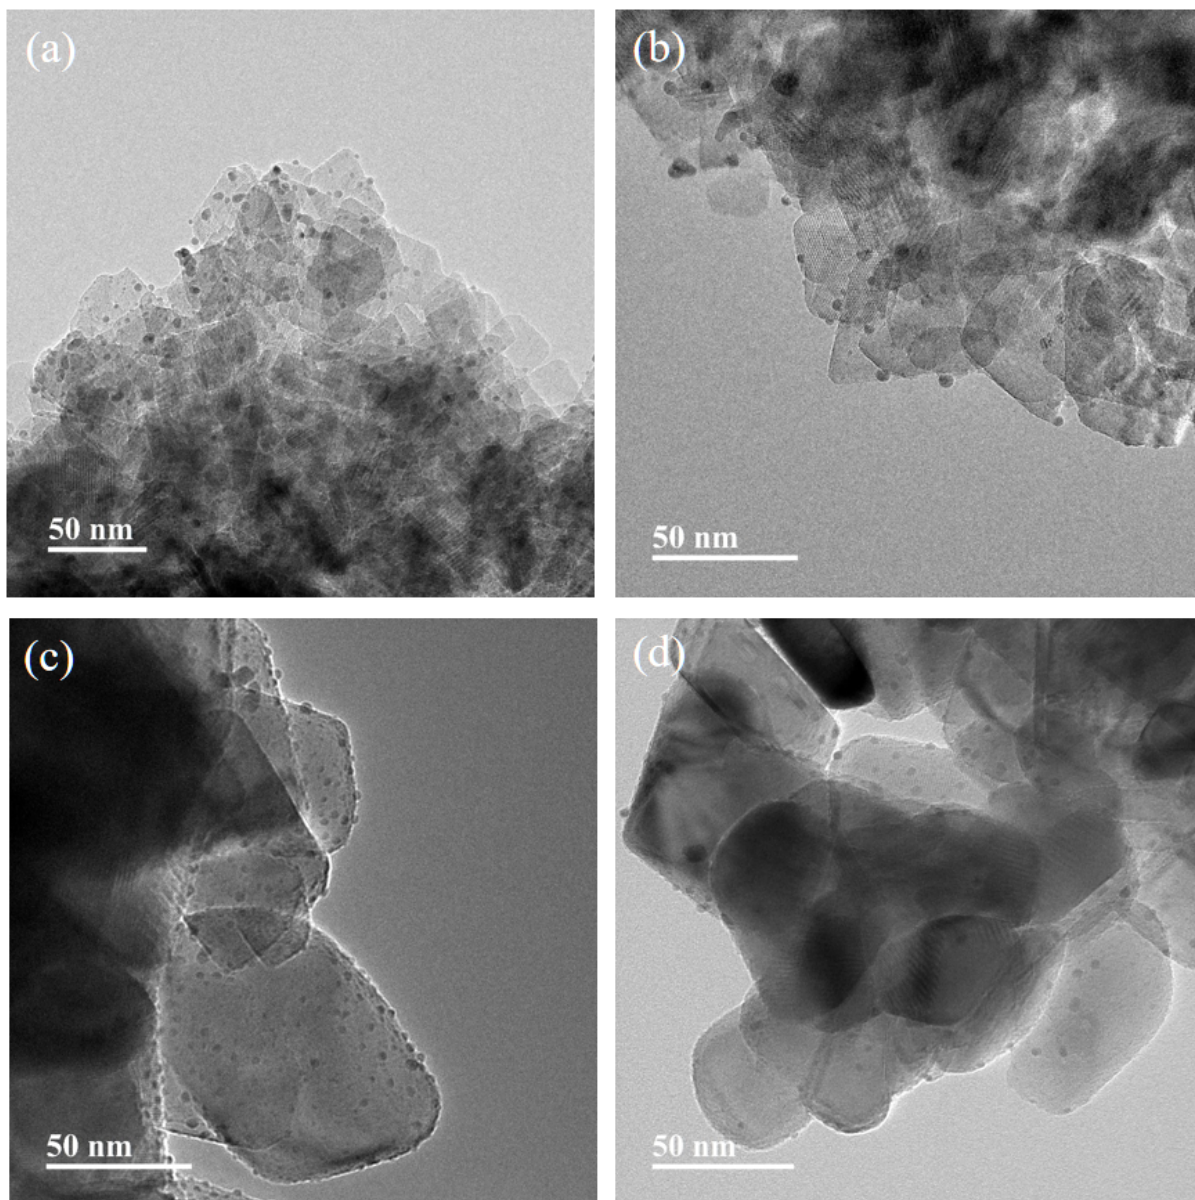

**Fig. S4.** (a) TEM image of Pd<sub>1</sub>Cu<sub>1</sub>/TiO<sub>2</sub>; (b) TEM image of Pd<sub>1</sub>Cu<sub>1</sub>/TiO<sub>2-x</sub>-200. (c) TEM image of Pd<sub>1</sub>Cu<sub>1</sub>/TiO<sub>2-x</sub>-400; (d) TEM image of Pd<sub>1</sub>Cu<sub>1</sub>/TiO<sub>2-x</sub>-600.

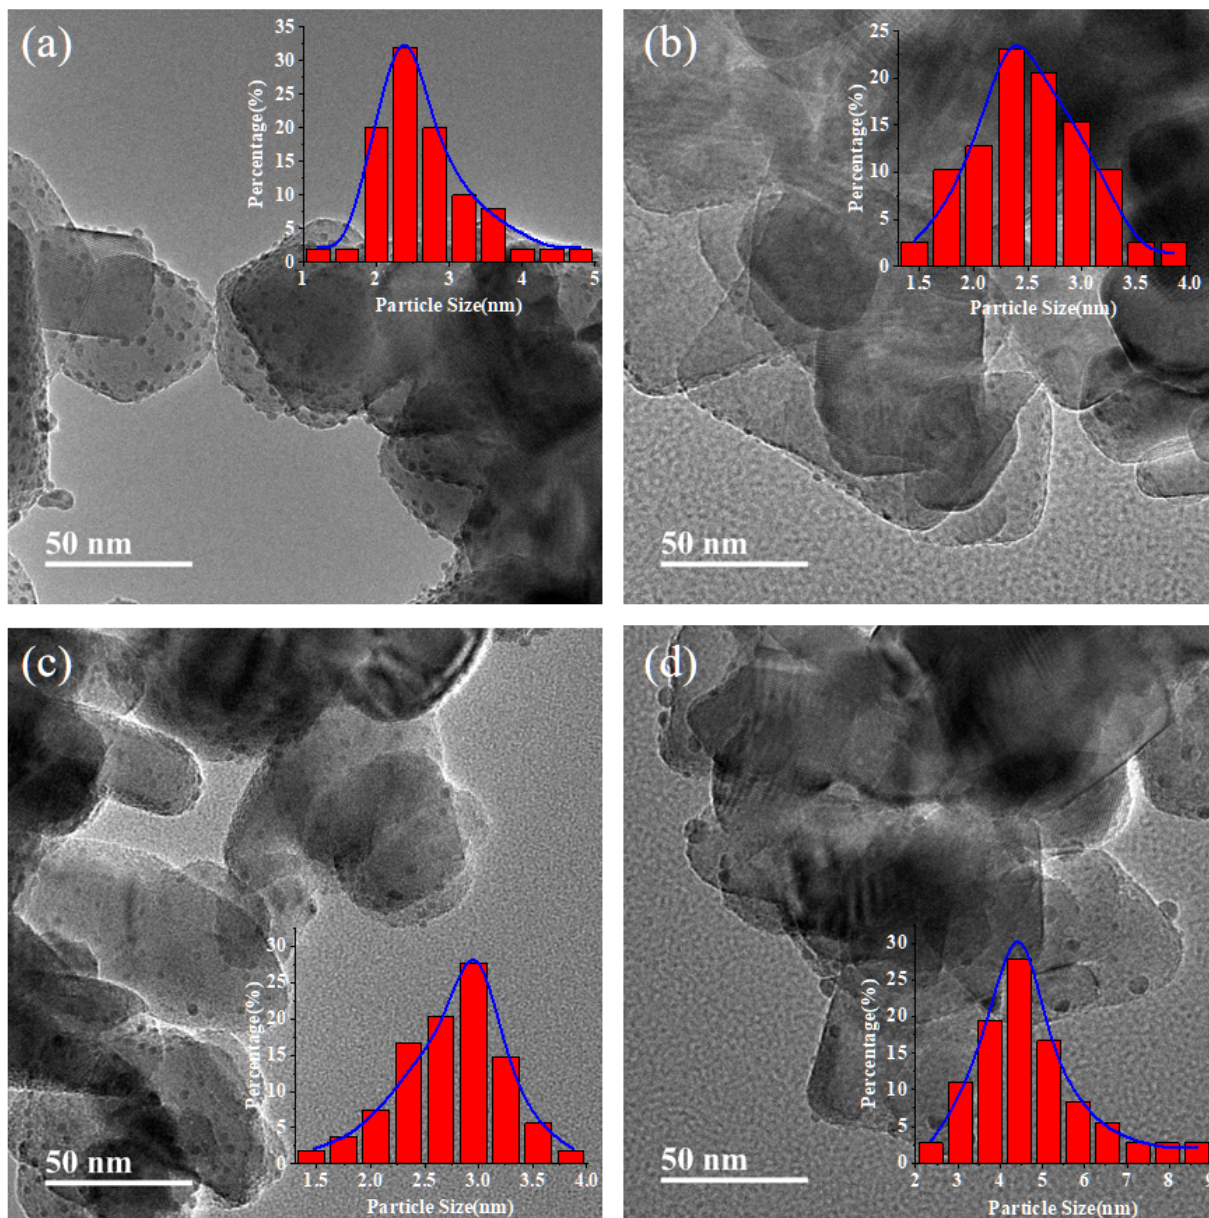

**Fig. S5.** TEM images of  $\text{Pd}_x\text{Cu}_y/\text{TiO}_{2-x}\text{-400}$ . (a) TEM image of  $\text{Pd}/\text{TiO}_{2-x}\text{-400}$ ; (b) TEM image of  $\text{Pd}_2\text{Cu}_1/\text{TiO}_{2-x}\text{-400}$ ; (c) TEM image of  $\text{Pd}_1\text{Cu}_2/\text{TiO}_{2-x}\text{-400}$ ; (d) TEM image of  $\text{Cu}/\text{TiO}_{2-x}\text{-400}$ .

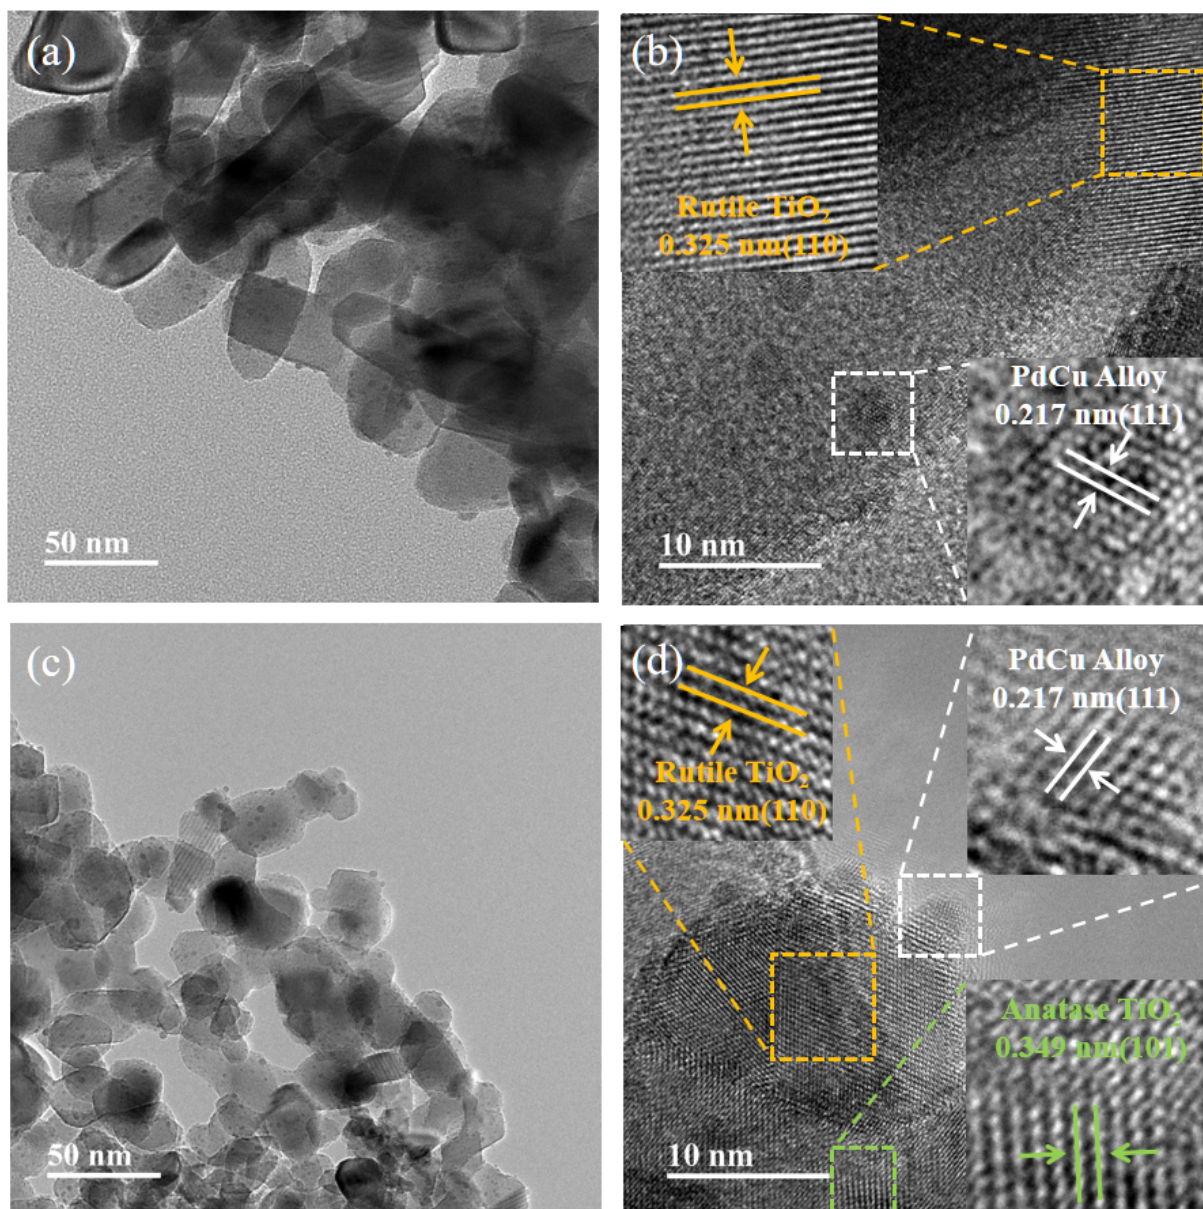

**Fig. S6.** (a, b) TEM and HRTEM images of Rutile Pd<sub>1</sub>Cu<sub>1</sub>/TiO<sub>2-x</sub>-400; (c, d) TEM and HRTEM images of P25 Pd<sub>1</sub>Cu<sub>1</sub>/TiO<sub>2-x</sub>-400.

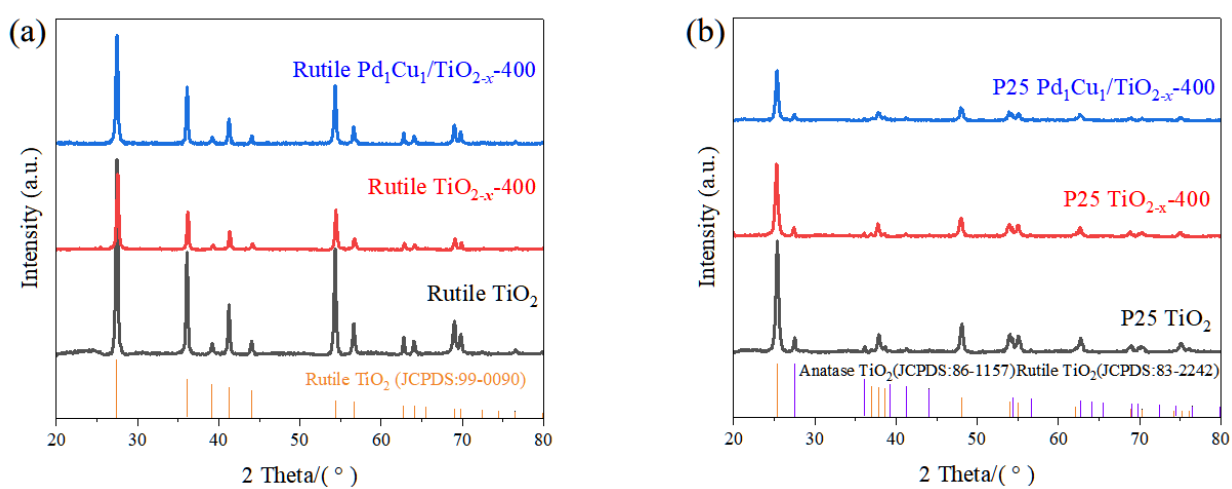

**Fig. S7.** XRD patterns of a series of different crystal phases (a) XRD patterns of rutile phase series; (b) XRD patterns of P25 series.

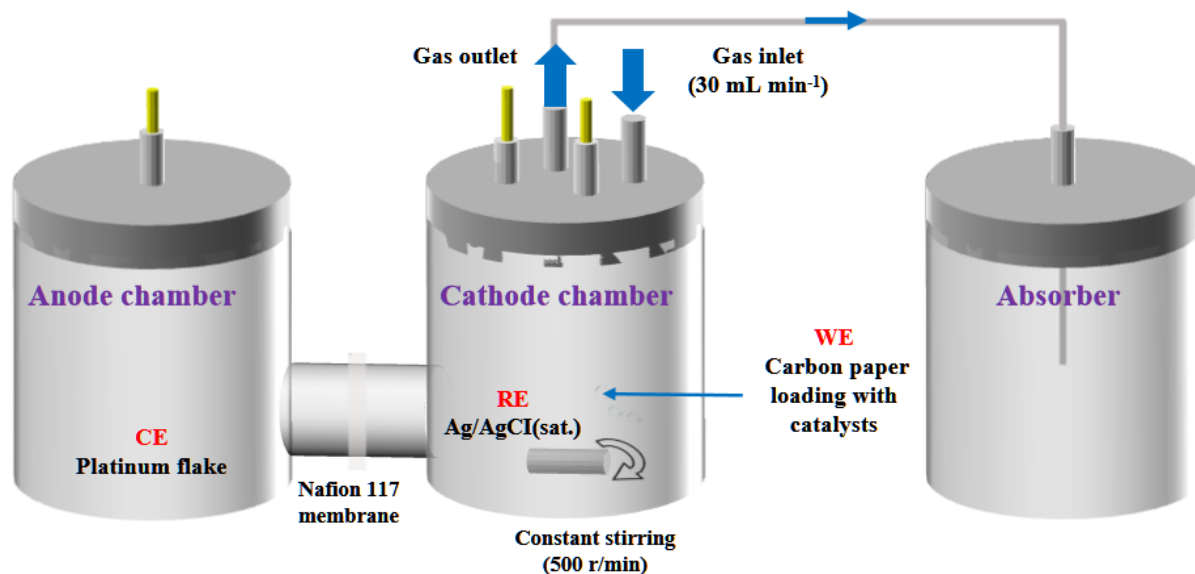

**Fig. S8.** Schematic diagram of a H-type electrolytic cell with a three-electrode system.

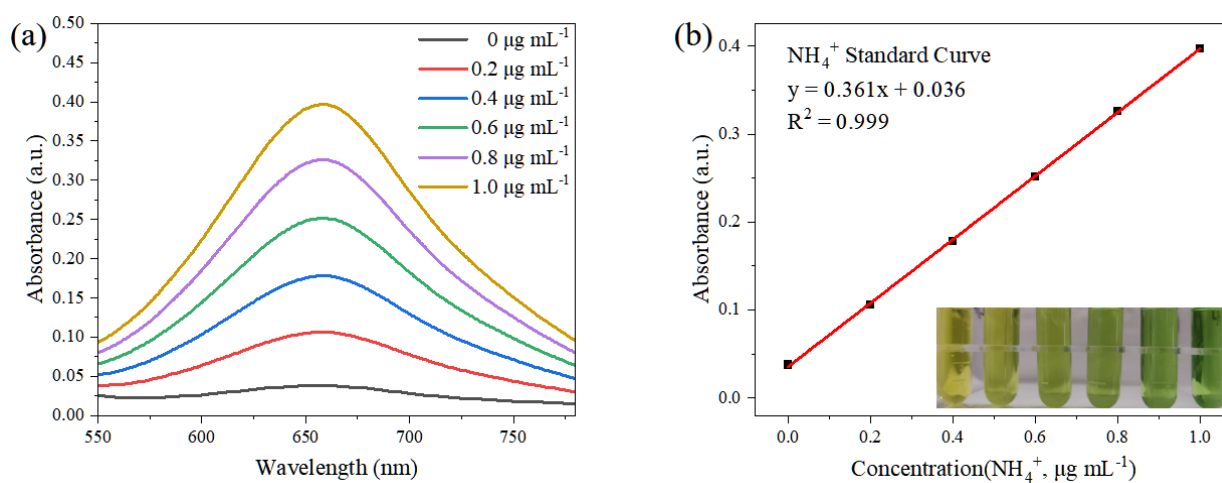

**Fig. S9.** Quantitative determination of  $\text{NH}_3$  concentration based on indophenol blue method. (a) UV-vis absorption spectra of  $\text{NH}_4^+$  standard solutions with specified concentrations; (b)  $\text{NH}_4^+$  Standard curve in 0.1 mol/L HCl of specified concentrations.



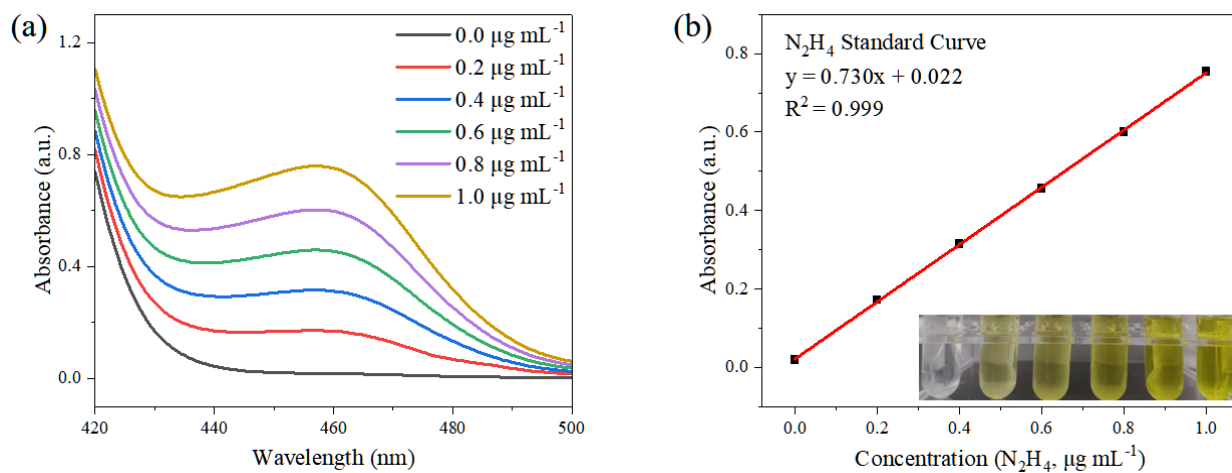

**Fig. S10.** Quantitative determination of  $\text{N}_2\text{H}_4$  concentration. (a) UV-vis absorption spectra of  $\text{N}_2\text{H}_4$  standard solutions with specified concentrations; (b)  $\text{N}_2\text{H}_4$  Standard curve in 0.1 mol/L HCl of specified concentrations.

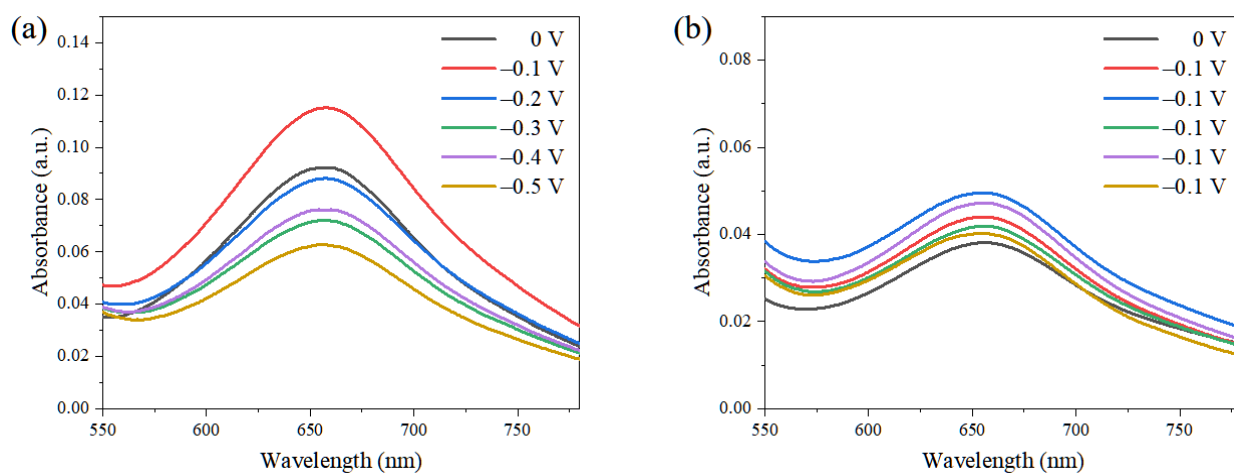

**Fig. S11.** (a) Uv-vis absorption spectra of electrolytes in cathode chamber after chronoamperometry test of  $\text{Pd}_1\text{Cu}_1/\text{TiO}_{2-x}\text{-400}$  catalyst in the potential range of 0~−0.5 V vs. RHE. (b) UV-vis absorption spectra of absorption solutions after chronoamperometry test of  $\text{Pd}_1\text{Cu}_1/\text{TiO}_{2-x}\text{-400}$  catalyst in the potential range of 0~−0.5 V vs. RHE.

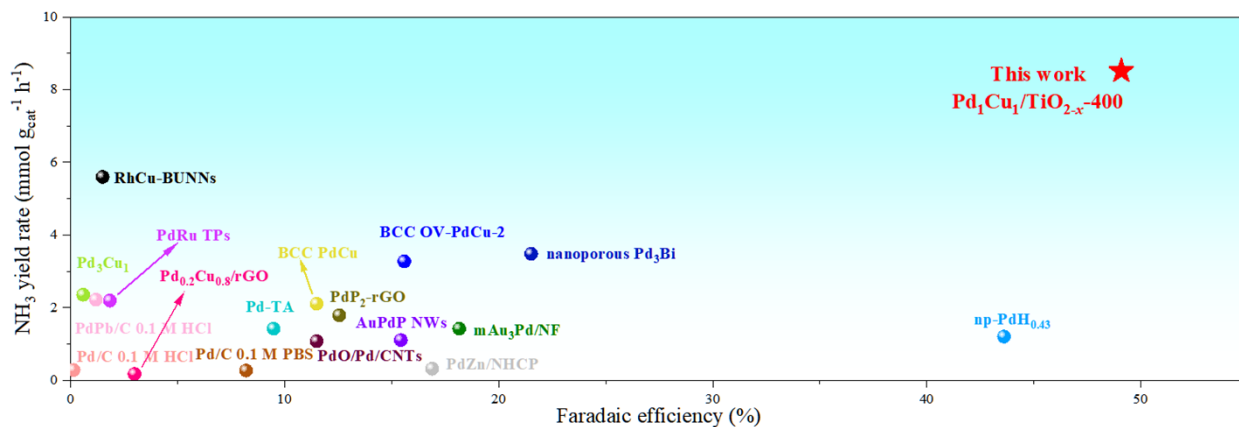

**Fig. S12** Comparison of the NRR performance of the Pd<sub>1</sub>Cu<sub>1</sub>/TiO<sub>2-x</sub>-400 catalyst with other palladium-based catalysts and their alloy catalysts reported to date under ambient conditions.

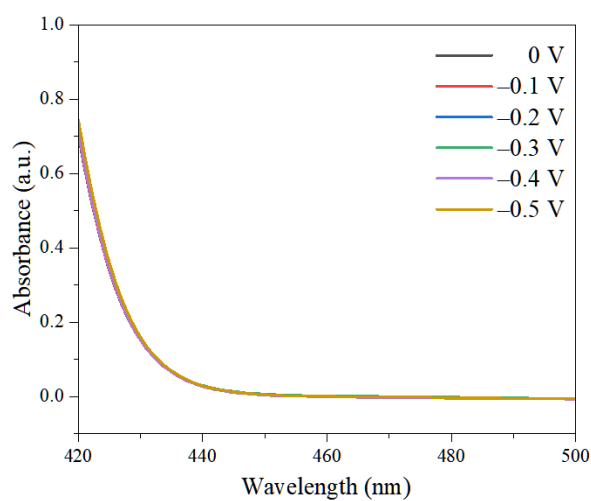

**Fig. S13.** The N<sub>2</sub>H<sub>4</sub> UV-vis absorption spectra of electrolytes at different potentials.

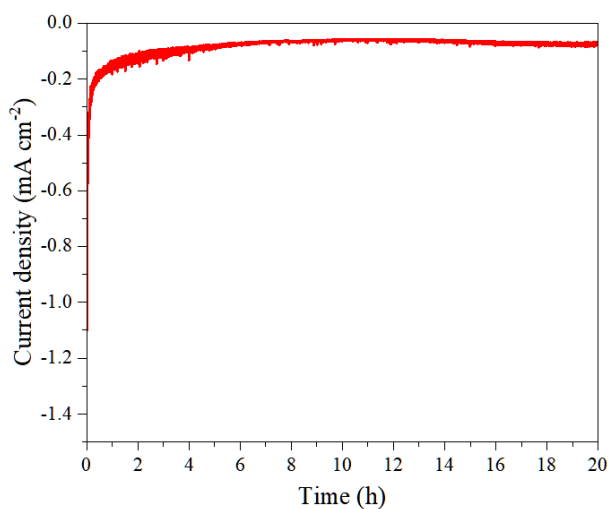

**Fig. S14.** chronoamperometry stability test of 20 h in 0.1 mol/L HCl under ambient conditions.

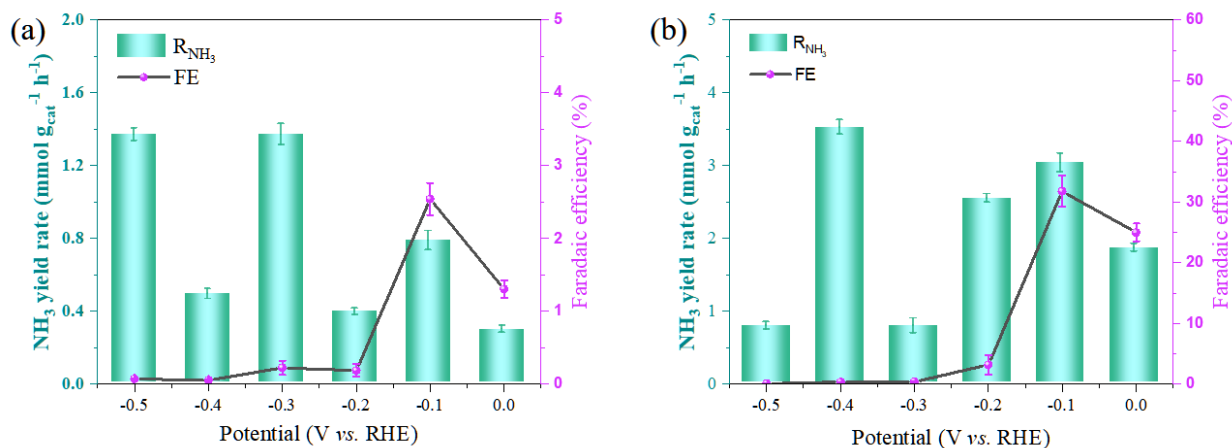

**Fig. S15.** (a) Electrocatalytic NRR performance of the  $\text{Pd}_1\text{Cu}_1/\text{TiO}_{2-x}-200$ ; (b) Electrocatalytic NRR performance of the  $\text{Pd}_1\text{Cu}_1/\text{TiO}_{2-x}-600$ .

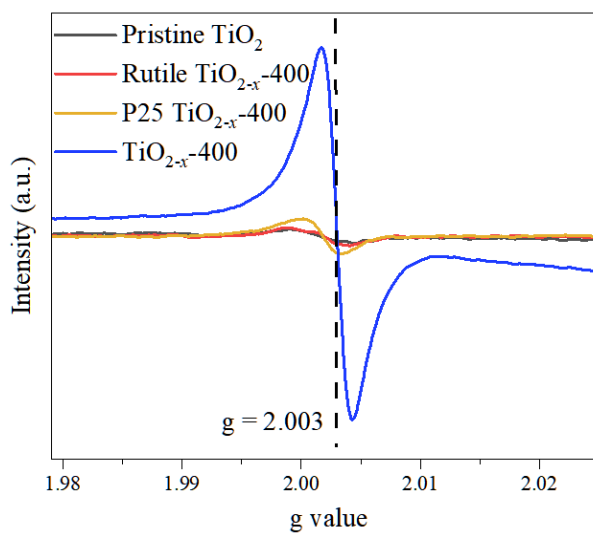

**Fig. S16.** EPR spectra of pristine  $\text{TiO}_2$ , Rutile  $\text{TiO}_{2-x}-400$ , P25  $\text{TiO}_{2-x}-400$ , and  $\text{TiO}_{2-x}-400$ .

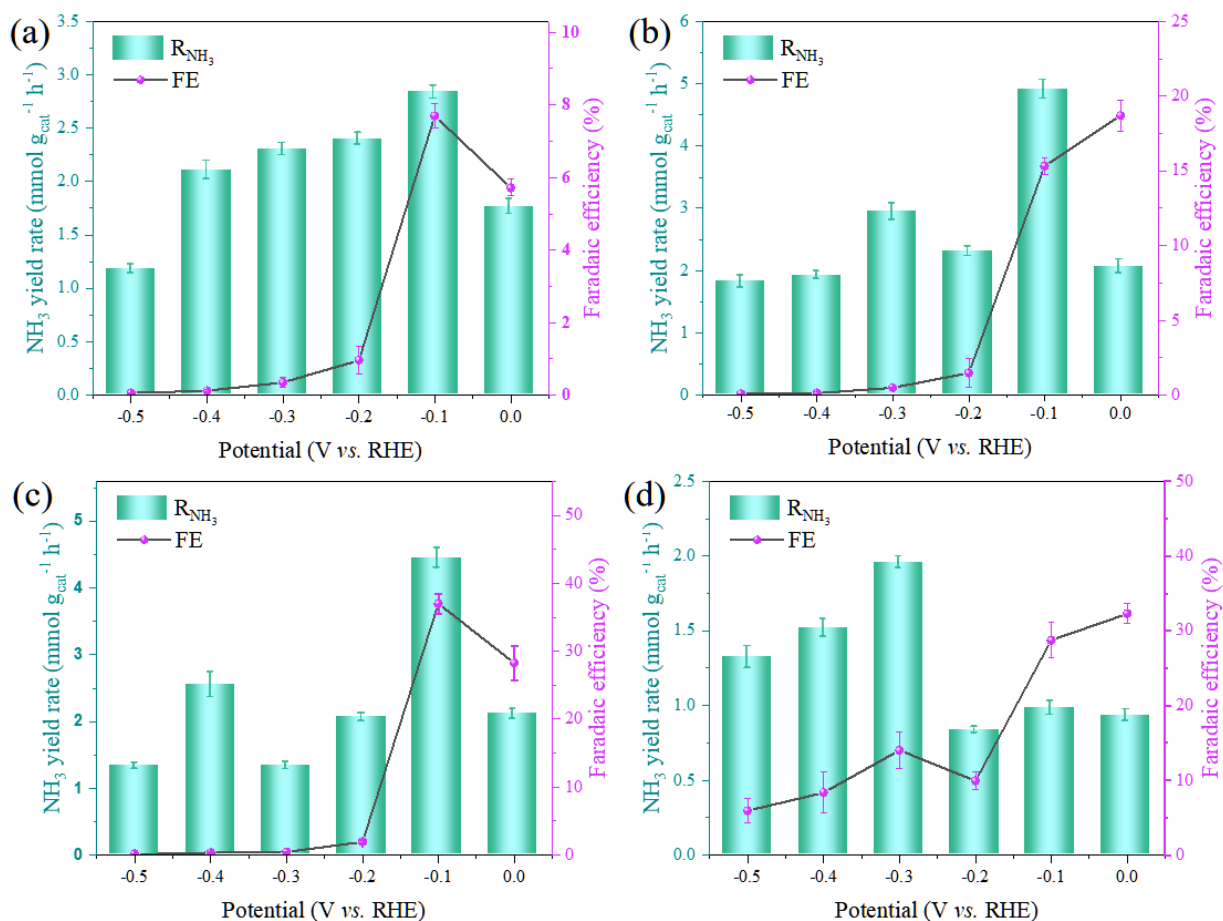

**Fig. S17.** (a) Electrocatalytic NRR performance of the pristine Pd/TiO<sub>2-x</sub>-400; (b) Electrocatalytic NRR performance of the Pd<sub>2</sub>Cu<sub>1</sub>/TiO<sub>2-x</sub>-400; (c) Electrocatalytic NRR performance of the Pd<sub>1</sub>Cu<sub>2</sub>/TiO<sub>2-x</sub>-400; (d) Electrocatalytic NRR performance of the Cu/TiO<sub>2-x</sub>-400.

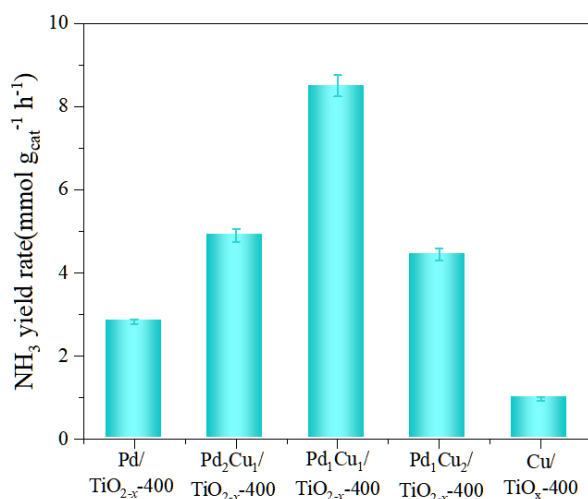

**Fig. S18.**  $\text{NH}_3$  yield rate of the Pd<sub>x</sub>Cu<sub>y</sub>/TiO<sub>2-x</sub>-400 of various metal mole ratios.

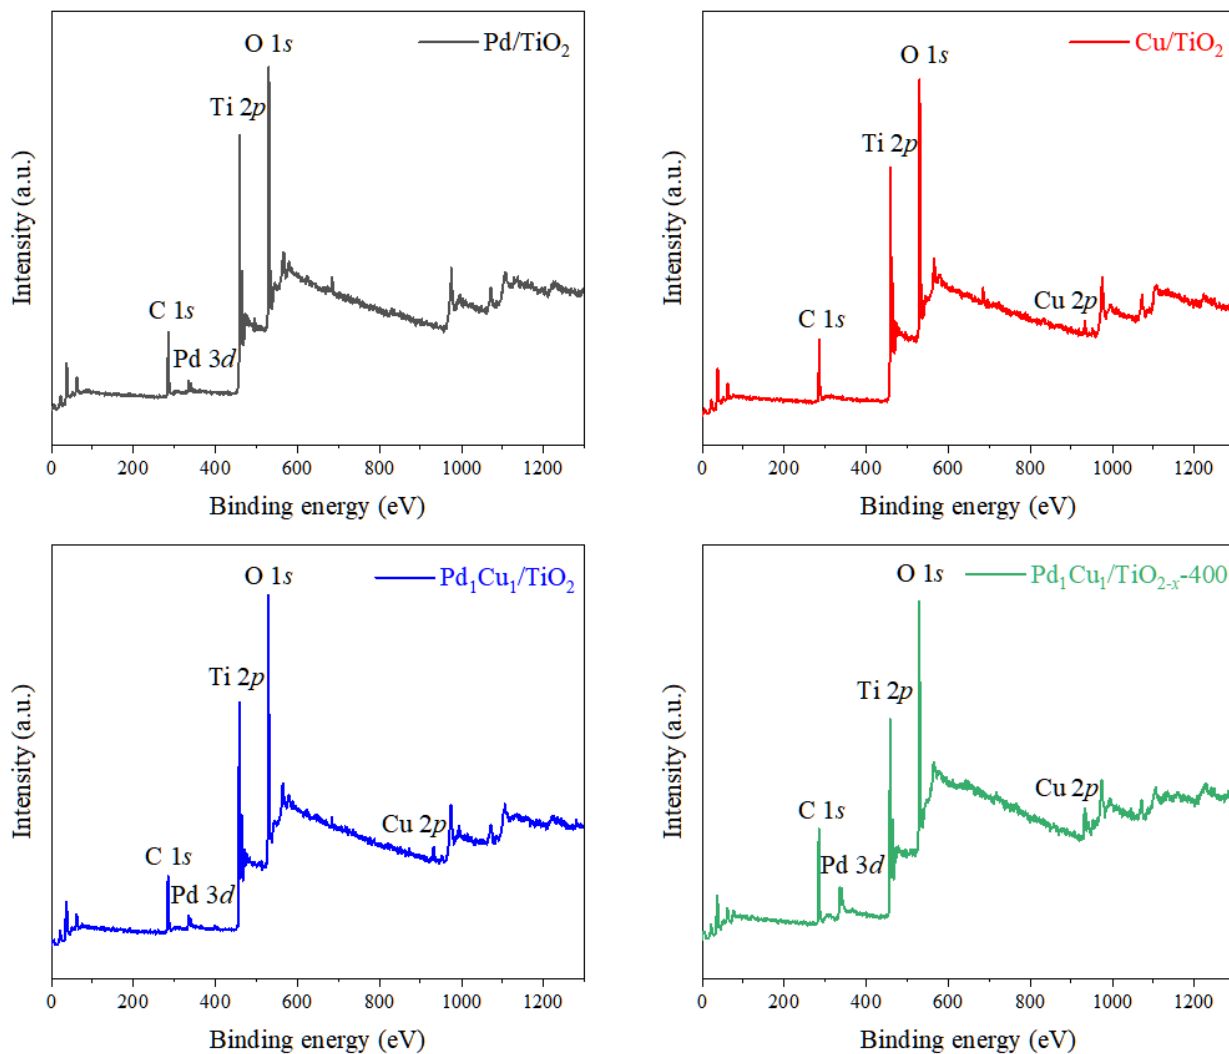

**Fig. S19.** Full high-resolution XPS spectra of (a) Pd/TiO<sub>2</sub>; (b) Cu/TiO<sub>2</sub>; (c) Pd<sub>1</sub>Cu<sub>1</sub>/TiO<sub>2</sub>; (d) Pd<sub>1</sub>Cu<sub>1</sub>/TiO<sub>2-x</sub>-400.

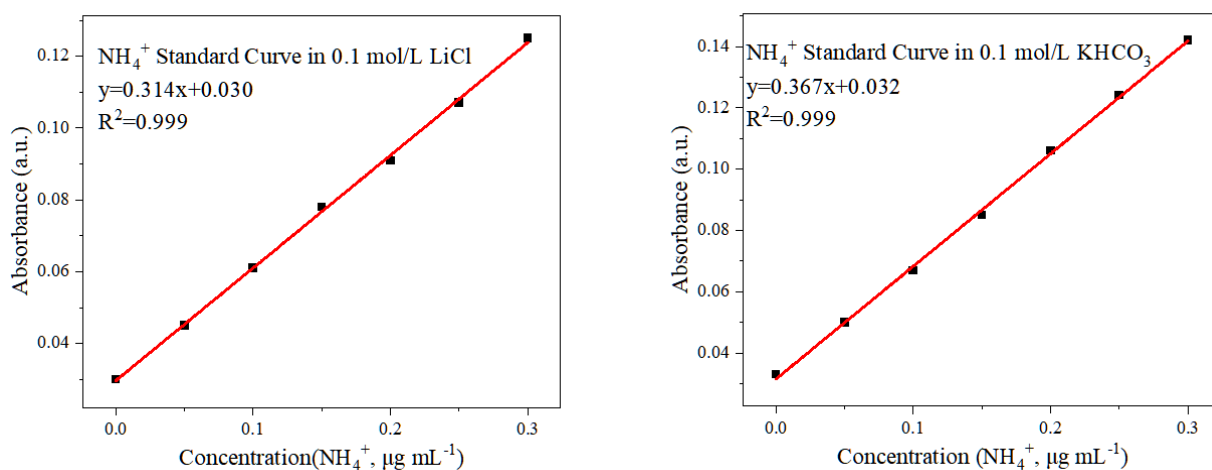

**Fig. S20.** (a) NH<sub>4</sub><sup>+</sup> Standard curve in 0.1 mol/L LiCl of specified concentrations; (b) NH<sub>4</sub><sup>+</sup> Standard curve in 0.1 mol/L KHCO<sub>3</sub> of specified concentrations.

**Table S1** Details for synthesis of PdCu/TiO<sub>2-x</sub>-400 electrocatalysts with various metal molar ratios.

| Catalyst                                                 | PdCl <sub>2</sub><br>( $\mu\text{L}$ , 5 mg mL <sup>-1</sup> ) | CuCl <sub>2</sub> ·2H <sub>2</sub> O<br>( $\mu\text{L}$ , 5 mg mL <sup>-1</sup> ) | TiO <sub>2-x</sub> -400<br>(mg) | NaBH <sub>4</sub> solution<br>(10 mg mL <sup>-1</sup> ) |
|----------------------------------------------------------|----------------------------------------------------------------|-----------------------------------------------------------------------------------|---------------------------------|---------------------------------------------------------|
| Pd/TiO <sub>2-x</sub> -400                               | 510                                                            | 0                                                                                 |                                 |                                                         |
| Pd <sub>2</sub> Cu <sub>1</sub> /TiO <sub>2-x</sub> -400 | 340                                                            | 164                                                                               |                                 |                                                         |
| Pd <sub>1</sub> Cu <sub>1</sub> /TiO <sub>2-x</sub> -400 | 256                                                            | 246                                                                               | 60                              | 10                                                      |
| Pd <sub>1</sub> Cu <sub>2</sub> /TiO <sub>2-x</sub> -400 | 170                                                            | 328                                                                               |                                 |                                                         |
| Cu/TiO <sub>2-x</sub> -400                               | 0                                                              | 492                                                                               |                                 |                                                         |

**Table S2** Details for synthesis of Pd<sub>1</sub>Cu<sub>1</sub>/TiO<sub>2-x</sub>-400 electrocatalysts with various metal loadings.

| Catalyst                                                       | PdCl <sub>2</sub><br>( $\mu\text{L}$ , 5 mg mL <sup>-1</sup> ) | CuCl <sub>2</sub> ·2H <sub>2</sub> O<br>( $\mu\text{L}$ , 5 mg mL <sup>-1</sup> ) | TiO <sub>2-x</sub> -400<br>(mg) | NaBH <sub>4</sub> solution<br>(10 mg mL <sup>-1</sup> ) |
|----------------------------------------------------------------|----------------------------------------------------------------|-----------------------------------------------------------------------------------|---------------------------------|---------------------------------------------------------|
| 1 wt%-Pd <sub>1</sub> Cu <sub>1</sub> /TiO <sub>2-x</sub> -400 | 128                                                            | 123                                                                               |                                 |                                                         |
| 2 wt%-Pd <sub>1</sub> Cu <sub>1</sub> /TiO <sub>2-x</sub> -400 | 256                                                            | 246                                                                               |                                 |                                                         |
| 3 wt%-Pd <sub>1</sub> Cu <sub>1</sub> /TiO <sub>2-x</sub> -400 | 384                                                            | 369                                                                               | 60                              | 10                                                      |
| 4 wt%-Pd <sub>1</sub> Cu <sub>1</sub> /TiO <sub>2-x</sub> -400 | 512                                                            | 492                                                                               |                                 |                                                         |
| 5 wt%-Pd <sub>1</sub> Cu <sub>1</sub> /TiO <sub>2-x</sub> -400 | 640                                                            | 615                                                                               |                                 |                                                         |

**Table S3** Weight quantifications of PdCu/TiO<sub>2-x</sub>-400 with various metal molar ratios based on ICP-MS.

| Catalyst                                                 | Loading (wt%) | Loading (wt%) | Molar ratio | Practical structure                                         |
|----------------------------------------------------------|---------------|---------------|-------------|-------------------------------------------------------------|
|                                                          | Pd            | Cu            |             |                                                             |
| Pd/TiO <sub>2-x</sub> -400                               | 2.26          | 0.00          | /           | Pd/TiO <sub>2-x</sub> -400                                  |
| Pd <sub>2</sub> Cu <sub>1</sub> /TiO <sub>2-x</sub> -400 | 1.91          | 0.58          | 1.98:1      | Pd <sub>1.98</sub> Cu <sub>1</sub> /TiO <sub>2-x</sub> -400 |
| Pd <sub>1</sub> Cu <sub>1</sub> /TiO <sub>2-x</sub> -400 | 1.38          | 0.75          | 1.10:1      | Pd <sub>1.10</sub> Cu <sub>1</sub> /TiO <sub>2-x</sub> -400 |
| Pd <sub>1</sub> Cu <sub>2</sub> /TiO <sub>2-x</sub> -400 | 0.93          | 1.16          | 0.48:1      | Pd <sub>0.48</sub> Cu <sub>1</sub> /TiO <sub>2-x</sub> -400 |
| Cu/TiO <sub>2-x</sub> -400                               | 0.00          | 2.07          | /           | Cu/TiO <sub>2-x</sub> -400                                  |

**Table S4** Weight quantifications of Pd<sub>1</sub>Cu<sub>1</sub>/TiO<sub>2-x</sub>-400 with various metal loadings based on ICP-MS..

| Catalyst                                                       | Loading (wt%) | Loading (wt%) | Molar ratio | Practical structure                                                  |
|----------------------------------------------------------------|---------------|---------------|-------------|----------------------------------------------------------------------|
|                                                                | Pd            | Cu            |             |                                                                      |
| 1 wt%-Pd <sub>1</sub> Cu <sub>1</sub> /TiO <sub>2-x</sub> -400 | 0.38          | 0.66          | 1.03:1      | 1.04 wt%-Pd <sub>1.03</sub> Cu <sub>1</sub> /TiO <sub>2-x</sub> -400 |
| 2 wt%-Pd <sub>1</sub> Cu <sub>1</sub> /TiO <sub>2-x</sub> -400 | 1.38          | 0.75          | 1.10:1      | 2.13 wt%-Pd <sub>1.10</sub> Cu <sub>1</sub> /TiO <sub>2-x</sub> -400 |
| 3 wt%-Pd <sub>1</sub> Cu <sub>1</sub> /TiO <sub>2-x</sub> -400 | 1.31          | 2.26          | 1.03:1      | 3.57 wt%-Pd <sub>1.03</sub> Cu <sub>1</sub> /TiO <sub>2-x</sub> -400 |
| 4 wt%-Pd <sub>1</sub> Cu <sub>1</sub> /TiO <sub>2-x</sub> -400 | 1.56          | 2.66          | 1.02:1      | 4.23 wt%-Pd <sub>1.02</sub> Cu <sub>1</sub> /TiO <sub>2-x</sub> -400 |
| 5 wt%-Pd <sub>1</sub> Cu <sub>1</sub> /TiO <sub>2-x</sub> -400 | 1.90          | 3.35          | 1.05:1      | 5.25 wt%-Pd <sub>1.05</sub> Cu <sub>1</sub> /TiO <sub>2-x</sub> -400 |

**Table S5** Comparison of the NRR performance of the Pd<sub>1</sub>Cu<sub>1</sub>/TiO<sub>2-x</sub>-400 catalyst with other palladium-based catalysts and their alloy catalysts reported to date under ambient conditions

| Catalyst                                                 | Electrolyte                           | Potential<br>(V vs. RHE) | NH <sub>3</sub> yield rate<br>(mmol g <sub>cat</sub> <sup>-1</sup> h <sup>-1</sup> ) | Faradaic<br>efficiency (%) | References |
|----------------------------------------------------------|---------------------------------------|--------------------------|--------------------------------------------------------------------------------------|----------------------------|------------|
| Pd <sub>1</sub> Cu <sub>1</sub> /TiO <sub>2-x</sub> -400 | 0.1 M HCl                             | -0.10                    | 8.51                                                                                 | 49.09                      | This work  |
| Pd-TA                                                    | 0.1 M Na <sub>2</sub> SO <sub>4</sub> | -0.45                    | 1.42                                                                                 | 9.49                       | 5          |
| Pd/C                                                     | 0.1 M PBS                             | -0.05                    | 0.26                                                                                 | 8.20                       | 6          |
| Pd/C                                                     | 0.1 M HCl                             | -0.05                    | 0.28                                                                                 | 0.15                       | 7          |
| PdPb/C                                                   | 0.1 M HCl                             | -0.05                    | 2.22                                                                                 | 1.19                       | 7          |
| PdO/Pd/CNTs                                              | 0.1 M NaOH                            | 0.10                     | 1.07                                                                                 | 11.50                      | 8          |
| PdP <sub>2</sub> -rGO                                    | 0.5 M LiClO <sub>4</sub>              | -0.10                    | 1.78                                                                                 | 12.56                      | 9          |
| nanoporous Pd <sub>3</sub> Bi                            | 0.05 M H <sub>2</sub> SO <sub>4</sub> | -0.20                    | 3.47                                                                                 | 21.52                      | 10         |
| np-PdH <sub>0.43</sub>                                   | 0.1 M PBS                             | -0.15                    | 1.20                                                                                 | 43.6                       | 11         |
| Pd <sub>0.2</sub> Cu <sub>0.8</sub> /rGO                 | 0.1 M KOH                             | -0.20                    | 0.16                                                                                 | 3.00                       | 12         |
| Nanoporous Pd <sub>3</sub> Cu <sub>1</sub>               | 1 M KOH                               | -0.25                    | 2.35                                                                                 | 0.60                       | 13         |
| RhCu-BUNNs                                               | 0.1 M KOH                             | -0.20                    | 5.59                                                                                 | 1.50                       | 14         |
| mAu <sub>3</sub> Pd/NF                                   | 0.1 M Na <sub>2</sub> SO <sub>4</sub> | -0.10                    | 1.41                                                                                 | 18.16                      | 15         |
| BCC PdCu                                                 | 0.5 M LiCl                            | -0.10                    | 2.10                                                                                 | 11.50                      | 16         |
| AuPdP NWs                                                | 0.1 M Na <sub>2</sub> SO <sub>4</sub> | -0.30                    | 1.10                                                                                 | 15.44                      | 17         |
| PdRu TPs                                                 | 0.1 M KOH                             | -0.20                    | 2.19                                                                                 | 1.85                       | 18         |
| PdZn/NHCP                                                | 0.1 M PBS                             | -0.20                    | 0.31                                                                                 | 16.9                       | 19         |
| BCC OV-PdCu-2                                            | 0.1 M Li <sub>2</sub> SO <sub>4</sub> | 0.00                     | 3.27                                                                                 | 15.6                       | 20         |

## References

1. Z. Geng, Y. Liu, X. Kong, P. Li, K. Li, Z. Liu, J. Du, M. Shu, R. Si and J. Zeng, Achieving a record-high yield rate of  $120.9 \mu\text{g}_{\text{NH}_3} \text{mg}_{\text{cat}}^{-1} \text{h}^{-1}$  for  $\text{N}_2$  electrochemical reduction over Ru single-atom catalysts, *Adv. Mater.*, 2018, **30**, 1803498.
2. L. L. Zhang, L. X. Ding, G. F. Chen, X. F. Yang and H. H. Wang, Ammonia synthesis under ambient conditions: selective electroreduction of dinitrogen to ammonia on black phosphorus nanosheets, *Angew. Chem. Int. Ed.*, 2019, **58**, 2612-2616.
3. Z. W. Fang, P. Wu, Y. M. Qian and G. H. Yu, Gel-derived amorphous bismuth-nickel alloy promotes electrocatalytic nitrogen fixation via optimizing nitrogen adsorption and activation, *Angew. Chem. Int. Ed.*, 2021, **60**, 4275-4281.
4. C. Y. Yang, B. L. Huang, S. X. Bai, Y. G. Feng, Q. Shao and X. Q. Huang, A generalized surface chalcogenation strategy for boosting the electrochemical  $\text{N}_2$  fixation of metal nanocrystals, *Adv. Mater.*, 2020, **32**, 2001267.
5. G. R. Deng, T. Wang, A. A. Alshehri, K. A. Alzahrani, Y. Wang, H. J. Ye, Y. L. Luo and X. P. Sun, Improving the electrocatalytic  $\text{N}_2$  reduction activity of Pd nanoparticles through surface modification, *J. Mater. Chem. A*, 2019, **7**, 21674-21677.
6. J. Wang, L. Yu, L. Hu, G. Chen, H. L. Xin and X. F. Feng, Ambient ammonia synthesis via palladium-catalyzed electrohydrogenation of dinitrogen at low overpotential, *Nat. Commun.*, 2018, **9**, 1795.
7. H. Zhao, D. Zhang, Z. Wang, Y. Han, X. Sun, H. Li, X. Wu, Y. Pan, Y. Qin, S. Lin, Z. Xu, J. Lai and L. Wang, High-performance nitrogen electroreduction at low overpotential by introducing Pb to Pd nanosponges, *Appl. Catal. B*, 2020, **265**, 118481.
8. J. L. Lv, S. L. Wu, Z. F. Tian, Y. X. Ye, J. Liu and C. H. Liang, Construction of PdO-Pd interfaces assisted by laser irradiation for enhanced electrocatalytic  $\text{N}_2$  reduction reaction, *J. Mater. Chem. A*, 2019, **7**, 12627-12634.
9. H. T. Xie, Q. Geng, X. J. Zhu, Y. L. Luo, L. Chang, X. B. Niu, X. F. Shi, A. M. Asiri, S. Y. Gao, Z. M. Wang and X. P. Sun, PdP<sub>2</sub> nanoparticles-reduced graphene oxide for electrocatalytic  $\text{N}_2$  conversion to  $\text{NH}_3$  under ambient conditions, *J. Mater. Chem. A*, 2019, **7**, 24760-24764.
10. X. J. Wang, M. Luo, J. Lan, M. Peng and Y. W. Tan, Nanoporous intermetallic Pd<sub>3</sub>Bi for efficient electrochemical nitrogen reduction, *Adv. Mater.*, 2021, **33**, 2007733.
11. W. Xu, G. Fan, J. Chen, J. Li, L. Zhang, S. Zhu, X. Su, F. Cheng and J. Chen, Nanoporous palladium hydride for electrocatalytic  $\text{N}_2$  reduction under ambient conditions, *Angew. Chem. Int. Ed.*, 2020, **59**, 3511-3516.
12. M. M. Shi, D. Bao, S. J. Li, B. R. Wulan, J. M. Yan and Q. Jiang, Anchoring PdCu amorphous nanocluster on graphene for electrochemical reduction of  $\text{N}_2$  to  $\text{NH}_3$  under ambient conditions in aqueous solution, *Adv. Energy Mater.*, 2018, **8**, 1800124.
13. F. Pang, Z. Wang, K. Zhang, J. He, W. Zhang, C. Guo and Y. Ding, Bimodal nanoporous Pd<sub>3</sub>Cu<sub>1</sub> alloy with restrained hydrogen evolution for stable and high yield electrochemical nitrogen reduction, *Nano Energy*, 2019, **58**, 834-841.
14. J. Bai, H. Huang, F.-M. Li, Y. Zhao, P. Chen, P.-J. Jin, S.-N. Li, H.-C. Yao, J.-H. Zeng and Y. Chen, Glycerol oxidation assisted electrocatalytic nitrogen reduction: ammonia and glyceraldehyde co-production on bimetallic RhCu ultrathin nanoflake nanoaggregates, *J. Mater. Chem. A*, 2019, **7**, 21149-21156.
15. H. Yu, Z. Wang, S. Yin, C. Li, Y. Xu, X. Li, L. Wang and H. Wang, Mesoporous Au<sub>3</sub>Pd film on Ni foam: a self-supported electrocatalyst for efficient synthesis of ammonia, *ACS Appl. Mater. Interfaces*, 2020, **12**, 436-442.
16. W. Tong, B. L. Huang, P. T. Wang, L. G. Li, Q. Shao and X. Q. Huang, Crystal-phase-engineered PdCu electrocatalyst for enhanced ammonia synthesis, *Angew. Chem. Int. Ed.*, 2020, **59**, 2649-



2653.

17. H. Wang, D. Yang, S. Liu, S. Yin, Y. Xu, X. Li, Z. Wang and L. Wang, Metal-nonmetal one-dimensional electrocatalyst: AuPdP nanowires for ambient nitrogen reduction to ammonia, *ACS Sustainable Chem. Eng.*, 2019, **7**, 15772-15777.
18. H. Wang, Y. Li, C. Li, K. Deng, Z. Wang, Y. Xu, X. Li, H. Xue and L. Wang, One-pot synthesis of bi-metallic PdRu tripods as an efficient catalyst for electrocatalytic nitrogen reduction to ammonia, *J. Mater. Chem. A*, 2019, **7**, 801-805.
19. M. Ma, X. Han, H. Li, X. Zhang, Z. Zheng, L. Zhou, J. Zheng, Z. Xie, Q. Kuang and L. Zheng, Tuning electronic structure of PdZn nanocatalyst via acid-etching strategy for highly selective and stable electrolytic nitrogen fixation under ambient conditions, *Appl. Catal. B*, 2020, **265**, 118568.
20. Z. C. Wang, X. K. Wu, J. Liu, D. Zhang, H. Zhao, X. Y. Zhang, Y. N. Qin, N. Z. Nie, D. Wang, J. P. Lai and L. Wang, Ordered vacancies on the body-centered cubic PdCu nanocatalysts, *Nano Lett.*, 2021, **21**, 9580-9586.
